# Supplementary material
Source: PubMed Central journal article supplement (PMC3400745)
Supplement: hdy201217x1.pdf [file hdy201217x1.pdf]

## Supplementary Materials

**Table S1** Distribution and frequency of the Y-chr subhaplogroups within the five contemporary provinces in Flanders. DNA-donors were attributed to provinces based on the birth place of their ORPA.

| Y-chr subhaplogroups  | West Flanders |           | East Flanders |           | Flemish Brabant |           | Limburg      |           | Antwerp      |           |
|-----------------------|---------------|-----------|---------------|-----------|-----------------|-----------|--------------|-----------|--------------|-----------|
|                       | Distribution  | Frequency | Distribution  | Frequency | Distribution    | Frequency | Distribution | Frequency | Distribution | Frequency |
| Y*(xBT)               | 0             | 0.00%     | 0             | 0.00%     | 0               | 0.00%     | 1            | 1.61%     | 0            | 0.00%     |
| E1b1b1* (E-M35*)      | 0             | 0.00%     | 0             | 0.00%     | 1               | 0.80%     | 0            | 0.00%     | 0            | 0.00%     |
| E1b1b1a1 (E-V12)      | 0             | 0.00%     | 0             | 0.00%     | 0               | 0.00%     | 0            | 0.00%     | 1            | 0.55%     |
| E1b1b1a2 (E-V13)      | 3             | 2.52%     | 1             | 0.91%     | 8               | 6.40%     | 1            | 1.61%     | 4            | 2.19%     |
| E1b1b1a3 (E-V22)      | 1             | 0.84%     | 0             | 0.00%     | 1               | 0.80%     | 1            | 1.61%     | 0            | 0.00%     |
| E1b1b1b (E-M81)       | 1             | 0.85%     | 0             | 0.00%     | 0               | 0.00%     | 0            | 0.00%     | 0            | 0.00%     |
| E1b1b1c* (E-M123*)    | 0             | 0.00%     | 0             | 0.00%     | 1               | 0.80%     | 0            | 0.00%     | 0            | 0.00%     |
| E1b1b1c1 (E-M34)      | 3             | 2.52%     | 1             | 0.91%     | 1               | 0.80%     | 1            | 1.61%     | 2            | 1.09%     |
| G2a* (G-P15*)         | 0             | 0.00%     | 0             | 0.00%     | 0               | 0.00%     | 1            | 1.61%     | 0            | 0.00%     |
| G2a3* (G-U8*)         | 3             | 2.52%     | 2             | 1.82%     | 5               | 4.00%     | 1            | 1.61%     | 6            | 3.28%     |
| G2a3a (G-U16)         | 0             | 0.00%     | 0             | 0.00%     | 0               | 0.00%     | 1            | 1.61%     | 0            | 0.00%     |
| G2a3b1 (G-U13)        | 0             | 0.00%     | 0             | 0.00%     | 0               | 0.00%     | 1            | 1.61%     | 0            | 0.00%     |
| I1* (I-M253*)         | 16            | 13.46%    | 16            | 14.55%    | 14              | 11.20%    | 3            | 4.84%     | 22           | 12.02%    |
| I1c (I-P109)          | 2             | 1.68%     | 0             | 0.00%     | 3               | 2.40%     | 0            | 0.00%     | 1            | 0.55%     |
| I2* (I-P215*)         | 0             | 0.00%     | 2             | 1.82%     | 4               | 3.20%     | 1            | 1.61%     | 2            | 1.09%     |
| I2a* (I-P37.2*)       | 2             | 1.68%     | 4             | 3.64%     | 1               | 0.80%     | 0            | 0.00%     | 2            | 1.09%     |
| I2b* (I-M223*)        | 5             | 4.20%     | 6             | 5.45%     | 3               | 2.40%     | 1            | 1.61%     | 6            | 3.28%     |
| I2b1 (I-M284)         | 0             | 0.00%     | 0             | 0.00%     | 0               | 0.00%     | 0            | 0.00%     | 2            | 1.09%     |
| I2b3 (I-P78)          | 0             | 0.00%     | 0             | 0.00%     | 1               | 0.80%     | 0            | 0.00%     | 1            | 0.55%     |
| I2b4 (I-P95)          | 0             | 0.00%     | 0             | 0.00%     | 1               | 0.80%     | 1            | 1.61%     | 0            | 0.00%     |
| J1* (J-M267*)         | 0             | 0.00%     | 1             | 0.91%     | 1               | 0.80%     | 0            | 0.00%     | 0            | 0.00%     |
| J1e* (J-P58*)         | 0             | 0.00%     | 1             | 0.91%     | 3               | 2.40%     | 0            | 0.00%     | 2            | 1.09%     |
| J2a* (J-M410*)        | 4             | 3.36%     | 2             | 1.82%     | 1               | 0.80%     | 1            | 1.61%     | 5            | 2.73%     |
| J2a2* (J-M67*)        | 0             | 0.00%     | 0             | 0.00%     | 1               | 0.80%     | 0            | 0.00%     | 1            | 0.55%     |
| J2a2a* (J-M92*)       | 0             | 0.00%     | 0             | 0.00%     | 1               | 0.80%     | 0            | 0.00%     | 0            | 0.00%     |
| J2a8 (J-M319)         | 0             | 0.00%     | 0             | 0.00%     | 1               | 0.80%     | 0            | 0.00%     | 1            | 0.55%     |
| J2b2* (J-M241*)       | 0             | 0.00%     | 0             | 0.00%     | 1               | 0.80%     | 1            | 1.61%     | 2            | 1.09%     |
| L1 (L-M27)            | 0             | 0.00%     | 0             | 0.00%     | 0               | 0.00%     | 0            | 0.00%     | 1            | 0.55%     |
| L2 (L-M317)           | 0             | 0.00%     | 0             | 0.00%     | 1               | 0.80%     | 0            | 0.00%     | 0            | 0.00%     |
| Q1* (Q-P36.1*)        | 0             | 0.00%     | 0             | 0.00%     | 0               | 0.00%     | 0            | 0.00%     | 3            | 1.64%     |
| R1a* (R-SRY10831.2*)  | 0             | 0.00%     | 0             | 0.00%     | 0               | 0.00%     | 1            | 1.61%     | 0            | 0.00%     |
| R1a1* (R-M17*)        | 2             | 1.68%     | 4             | 3.64%     | 4               | 3.20%     | 5            | 8.06%     | 11           | 6.01%     |
| R1b1* (R-P25*)        | 0             | 0.00%     | 0             | 0.00%     | 1               | 0.80%     | 0            | 0.00%     | 0            | 0.00%     |
| R1b1b* (R-P297*)      | 1             | 0.84%     | 0             | 0.00%     | 0               | 0.00%     | 0            | 0.00%     | 0            | 0.00%     |
| R1b1b2* (R-M269*)     | 4             | 3.36%     | 1             | 0.91%     | 2               | 1.60%     | 1            | 1.61%     | 3            | 1.64%     |
| R1b1b2a* (R-P310*)    | 2             | 1.68%     | 0             | 0.00%     | 2               | 1.60%     | 0            | 0.00%     | 1            | 0.55%     |
| R1b1b2a1 (R-U106)     | 32            | 26.89%    | 33            | 30.00%    | 25              | 20.00%    | 15           | 24.16%    | 48           | 26.23%    |
| R1b1b2a2* (R-P312*)   | 26            | 21.85%    | 18            | 16.36%    | 25              | 20.00%    | 18           | 29.03%    | 34           | 18.58%    |
| R1b1b2a2d (R-SRY2627) | 0             | 0.00%     | 0             | 0.00%     | 1               | 0.80%     | 0            | 0.00%     | 0            | 0.00%     |
| R1b1b2a2g (R-U152)    | 12            | 10.08%    | 16            | 14.55%    | 11              | 8.80%     | 6            | 9.68%     | 21           | 11.48%    |
| T* (T-M70*)           | 0             | 0.00%     | 2             | 1.82%     | 0               | 0.00%     | 0            | 0.00%     | 1            | 0.55%     |
| Total                 | 119           |           | 110           |           | 125             |           | 62           |           | 183          |           |

**R-Script** Script written for R (The R Foundation for Statistical Computing, 2011), implementing a permutation test for population genetic differentiation using weighted average of the haplotype diversity  $H_s$  as a test statistic.

---

```
#R-script 'In the name of the migrant father'  
#allele counts should be imported as a matrix or a table in the variable 'tab', with the alleles as rows  
and the populations as columns
```

```
tab <- as.matrix(tab)  
tab <- tab[rowSums(tab)!=0,]
```

```
batches <- 20  
permutations <- 500
```

```
pwHs <- rep(NA,batches)
```

```
sums <- colSums(tab)  
tot <- sum(sums)
```

```
square.probs <- (tab/(rep(1,nrow(tab))%*%t(sums)))^2  
hs <- (1-colSums(square.probs))*sums/(sums-1)  
wHs <- sum(hs*(sums-2)/(tot-4))
```

```
expanded.s <- rep(1:nrow(tab), rowSums(tab))  
perm <- factor(sample(expanded.s))
```

```
subs <- matrix(0, nrow=nrow(tab), ncol=ncol(tab))  
starts <- cumsum(c(0,sums[-length(sums)]))+1  
stops <- cumsum(sums)
```

```
for(b in 1:batches)  
{  
  pwHs <- 0  
  for (p in 1:permutations)  
  {  
    perm <- sample(perm)  
    subs[] <- mapply(function(x,y) table(perm[x:y]),starts,stops)  
    sub.sums <- colSums(subs)  
    sub.square.probs <- (subs/(rep(1,nrow(subs))%*%t(sub.sums)))^2  
    sub.hs <- (1-colSums(sub.square.probs))*sub.sums/(sub.sums-1)  
    sub.wHs <- sum(sub.hs*(sub.sums-2)/(tot-4))  
    if (sub.wHs <= wHs)  
      pwHs <- pwHs + 1
```

```
}  
  pwHs[b] <- pwhs/permutations  
}  
  
m <- mean(pwHs)  
se <- sd(pwHs)/sqrt(batches)  
print(paste('p =', m, '+-', round(se, 5), 'se'))
```

---

## References

The R Foundation for Statistical Computing (2011) *R version 2.13.0*
